# Supplementary material for: Tribo-electrification and Powder Adhesion Studies in the Development of Polymeric Hydrophilic Drug Matrices
Source: MDPI journal article supplement (doi:10.3390/ma8041482), 2015-03-30
Supplement: s1 [file s1]

## Supplementary Information

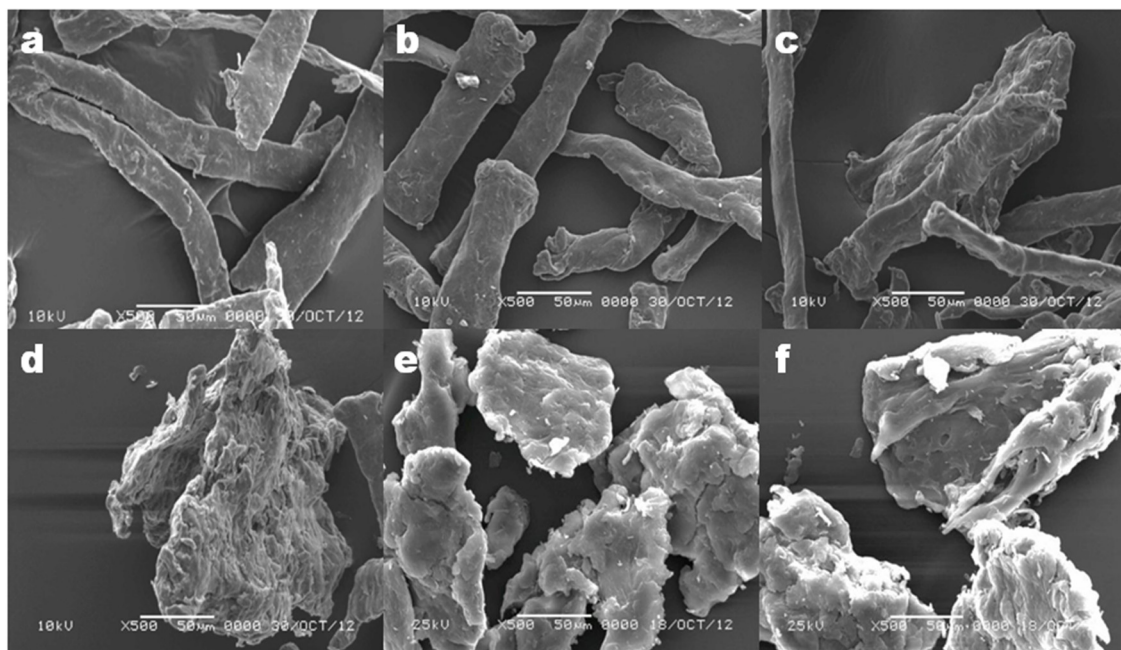

**Figure S1.** SEM micrographs of different cellulose ethers, (a) A4M; (b) F4M; (c) E4M; (d) K4M; (e) K15M and (f) K100M.

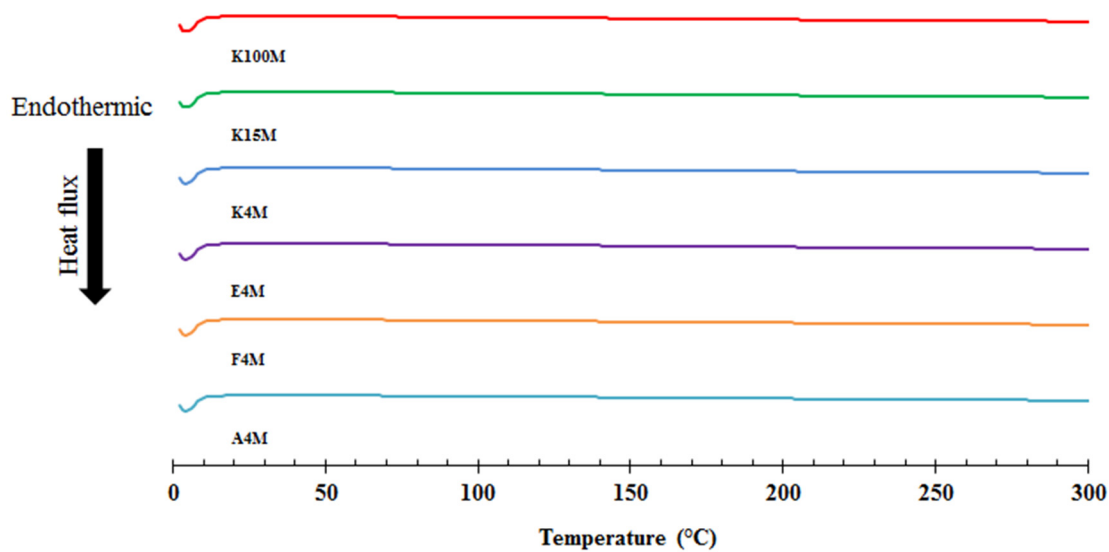

**Figure S2.** DSC profiles of MC/HPMC.

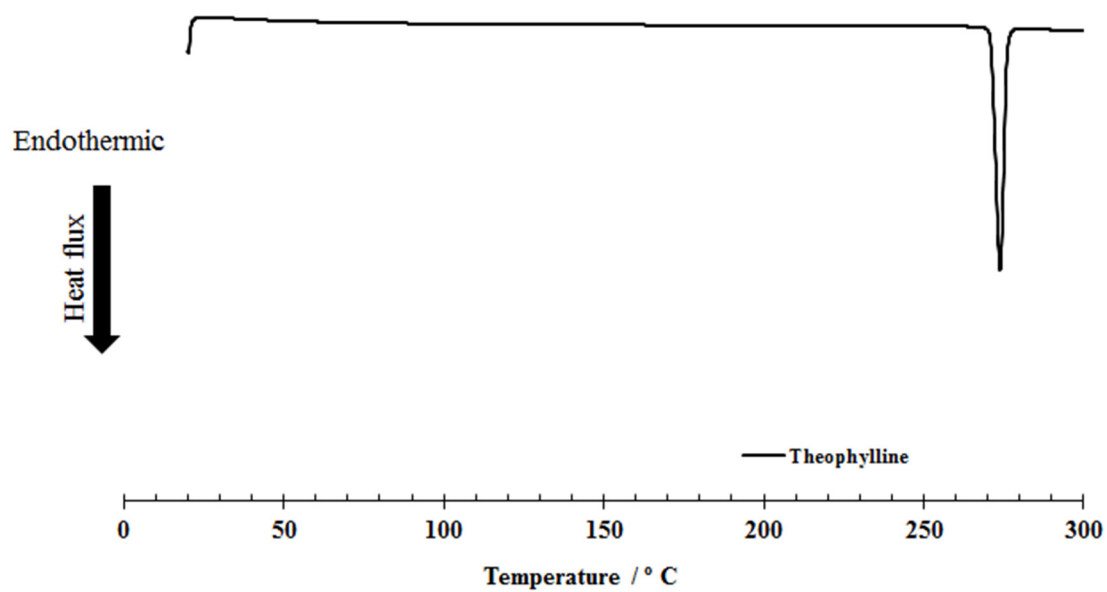

**Figure S3.** DSC profiles of theophylline.

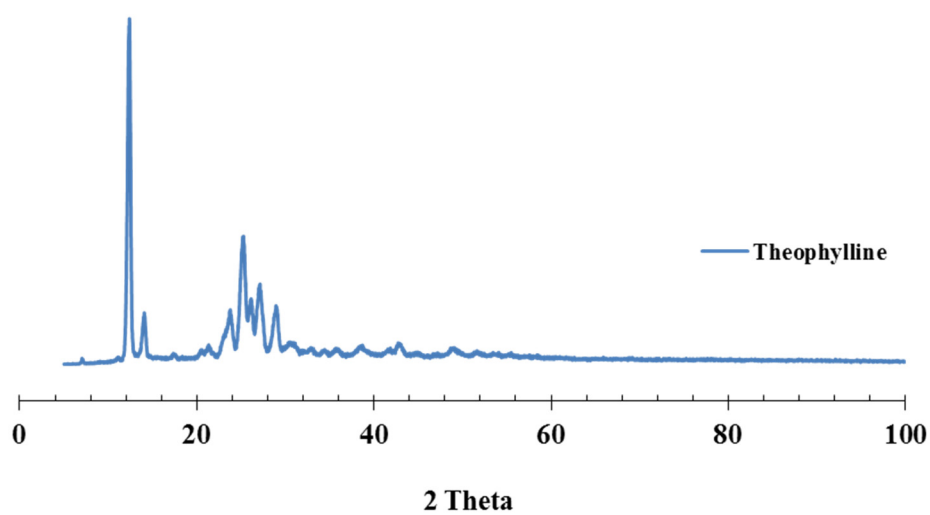

**Figure S4.** XRD profile theophylline.
